# Supplementary material
Source: MDPI journal article supplement (https://www.mdpi.com/2076-3271/10/2/21)
Supplement: s1 [file s1]

## Search term

### Medline

("heart failure"[MeSH Terms] OR ("heart"[All Fields] AND "failure"[All Fields]) OR "heart failure"[All Fields]) AND (("recover"[All Fields] OR "recovered"[All Fields] OR "recovering"[All Fields] OR "recovers"[All Fields]) AND ("eject"[All Fields] OR "ejected"[All Fields] OR "ejecting"[All Fields] OR "ejection"[All Fields] OR "ejectional"[All Fields] OR "ejctions"[All Fields] OR "ejects"[All Fields]) AND ("dose fractionation, radiation"[MeSH Terms] OR ("dose"[All Fields] AND "fractionation"[All Fields] AND "radiation"[All Fields]) OR "radiation dose fractionation"[All Fields] OR "fractionation"[All Fields] OR "chemical fractionation"[MeSH Terms] OR ("chemical"[All Fields] AND "fractionation"[All Fields]) OR "chemical fractionation"[All Fields] OR "fraction"[All Fields] OR "fraction s"[All Fields] OR "fractionate"[All Fields] OR "fractionated"[All Fields] OR "fractionates"[All Fields] OR "fractionating"[All Fields] OR "fractionationed"[All Fields] OR "fractionations"[All Fields] OR "fractionator"[All Fields] OR "fractionators"[All Fields] OR "fractioned"[All Fields] OR "fractioning"[All Fields] OR "fractionized"[All Fields] OR "fractions"[All Fields]))

### EMBASE

('heart failure'/exp OR 'heart failure' OR (('heart'/exp OR heart) AND ('failure'/exp OR failure))) AND ('recovered ejection fraction' OR (recovered AND ejection AND fraction)) AND ([article]/lim OR [article in press]/lim)

**Table S1:** Newcastle-Ottawa Scale of the included studies.

| First author, year   | Selection          |                                     |               |                               | Comparability | Outcome               |                    |                    | Total score |
|----------------------|--------------------|-------------------------------------|---------------|-------------------------------|---------------|-----------------------|--------------------|--------------------|-------------|
|                      | Representativeness | Selection of the non-exposed cohort | Ascertainment | Endpoint not present at start | Comparability | Assessment of outcome | Follow-up duration | Adequacy follow-up |             |
|                      |                    |                                     |               |                               | (Confounding) |                       |                    |                    |             |
| Abe, 2020            | *                  | *                                   | *             | *                             | **            | *                     | *                  | *                  | 9           |
| Basuray, 2014        | *                  | *                                   | *             | *                             | **            | *                     | *                  | *                  | 9           |
| Bermejo, 2017        | *                  | *                                   | *             | *                             | **            | *                     | *                  | *                  | 9           |
| Chang, 2018          | *                  | *                                   | *             | *                             | **            | *                     |                    | *                  | 8           |
| Chang, 2020          | *                  | *                                   | *             | *                             | **            | *                     | *                  | *                  | 9           |
| Florea, 2016         | *                  | *                                   | *             | *                             | **            | *                     | *                  | *                  | 9           |
| Howlett, 2020        | *                  | *                                   | *             | *                             | **            | *                     | *                  | *                  | 9           |
| Kalogeropoulos, 2016 | *                  | *                                   | *             | *                             | **            | *                     | *                  | *                  | 9           |
| Lupon, 2017          | *                  | *                                   | *             | *                             | **            | *                     | *                  | *                  | 9           |
| Pereira, 2019        | *                  | *                                   | *             | *                             | **            | *                     | *                  | *                  | 9           |
| Punnoose, 2011       | *                  | *                                   | *             | *                             | **            | *                     | *                  | *                  | 9           |
| Shah, 2020           | *                  | *                                   | *             | *                             | **            | *                     | *                  | *                  | 9           |
| Swat, 2018           | *                  | *                                   | *             | *                             | **            | *                     | *                  | *                  | 9           |
| Trullas, 2016        | *                  | *                                   | *             | *                             | **            | *                     | *                  | *                  | 9           |
| Torii, 2021          | *                  | *                                   | *             | *                             | **            | *                     | *                  | *                  | 9           |
| Ye, 2021             | *                  | *                                   | *             | *                             | **            | *                     |                    |                    | 7           |
| Zeller, 2021         | *                  | *                                   | *             | *                             | **            | *                     | *                  | *                  | 9           |
| Zhang, 2021          | *                  | *                                   | *             | *                             | **            | *                     | *                  | *                  | 9           |

The Newcastle-Ottawa scale uses a star system (0 to 9) to evaluate included studies on 3 domains: selection, comparability, and outcomes. Star (\*) = item presents. Maximum 1 star (\*) for selection and outcome components and 2 stars (\*\*) for comparability components. Higher scores represent higher study quality.
